# Supplementary material for: 4-Methyl/Phenyl-1,2,5,6-tetraazafluoranthen-3(2H)-ones Synthesis: Mechanistic Pathway Study and Single-Crystal X-ray Analysis of the Intermediates
Source: MDPI journal article supplement (doi:10.3390/cryst13111537), 2023-10-26
Supplement: s1 [file s1]

## SUPPORTING INFORMATION

### 4-Methyl/phenyl-1,2,5,6-tetraazafluoranthene-3(2*H*)-ones Synthesis: Mechanistic Pathway Study and Single-Crystal X-ray Analysis of the Intermediates

Ahmed A. M. Sarhan <sup>1</sup>, Matti Haukka <sup>2</sup>, Assem Barakat <sup>3,\*</sup>, Saied M. Soliman <sup>4</sup>, Ahmed T. A. Boraie <sup>5,\*</sup>, Manar Sopaih <sup>5</sup> and Eid E. Salama <sup>5</sup>

<sup>1</sup> Chemistry Department, Faculty of Science, Arish University, Al-Arish 45511, Egypt;  
ahmed\_sarhan252@yahoo.com

<sup>2</sup> Department of Chemistry, University of Jyväskylä, P.O. Box 35, FI-40014 Jyväskylä, Finland; matti.o.haukka@ju.fi

<sup>3</sup> Department of Chemistry, College of Science, King Saud University, P.O. Box 2455, Riyadh 11451,  
Saudi Arabia

<sup>4</sup> Chemistry Department, Faculty of Science, Alexandria University, P.O. Box 426, Alexandria 21321, Egypt; saeed.soliman@alexu.edu.eg

<sup>5</sup> Chemistry Department, Faculty of Science, Suez Canal University, Ismailia 41522, Egypt;  
manar\_shalabi@science.edu.eg (M.S.);  
eidsalama2000@gmail.com or eid\_mohamed@science.suez.edu.eg (E.E.S.);

\* Correspondence: ambarakat@ksu.edu.sa (A.B.);  
ahmed\_tawfeek83@yahoo.com or ahmed\_boraie@science.suez.edu.eg (A.T.A.B.);  
Tel.: +966-11467-5901 (A.B.); Fax: +966-11467-5992 (A.B.)

# NMR Spectra

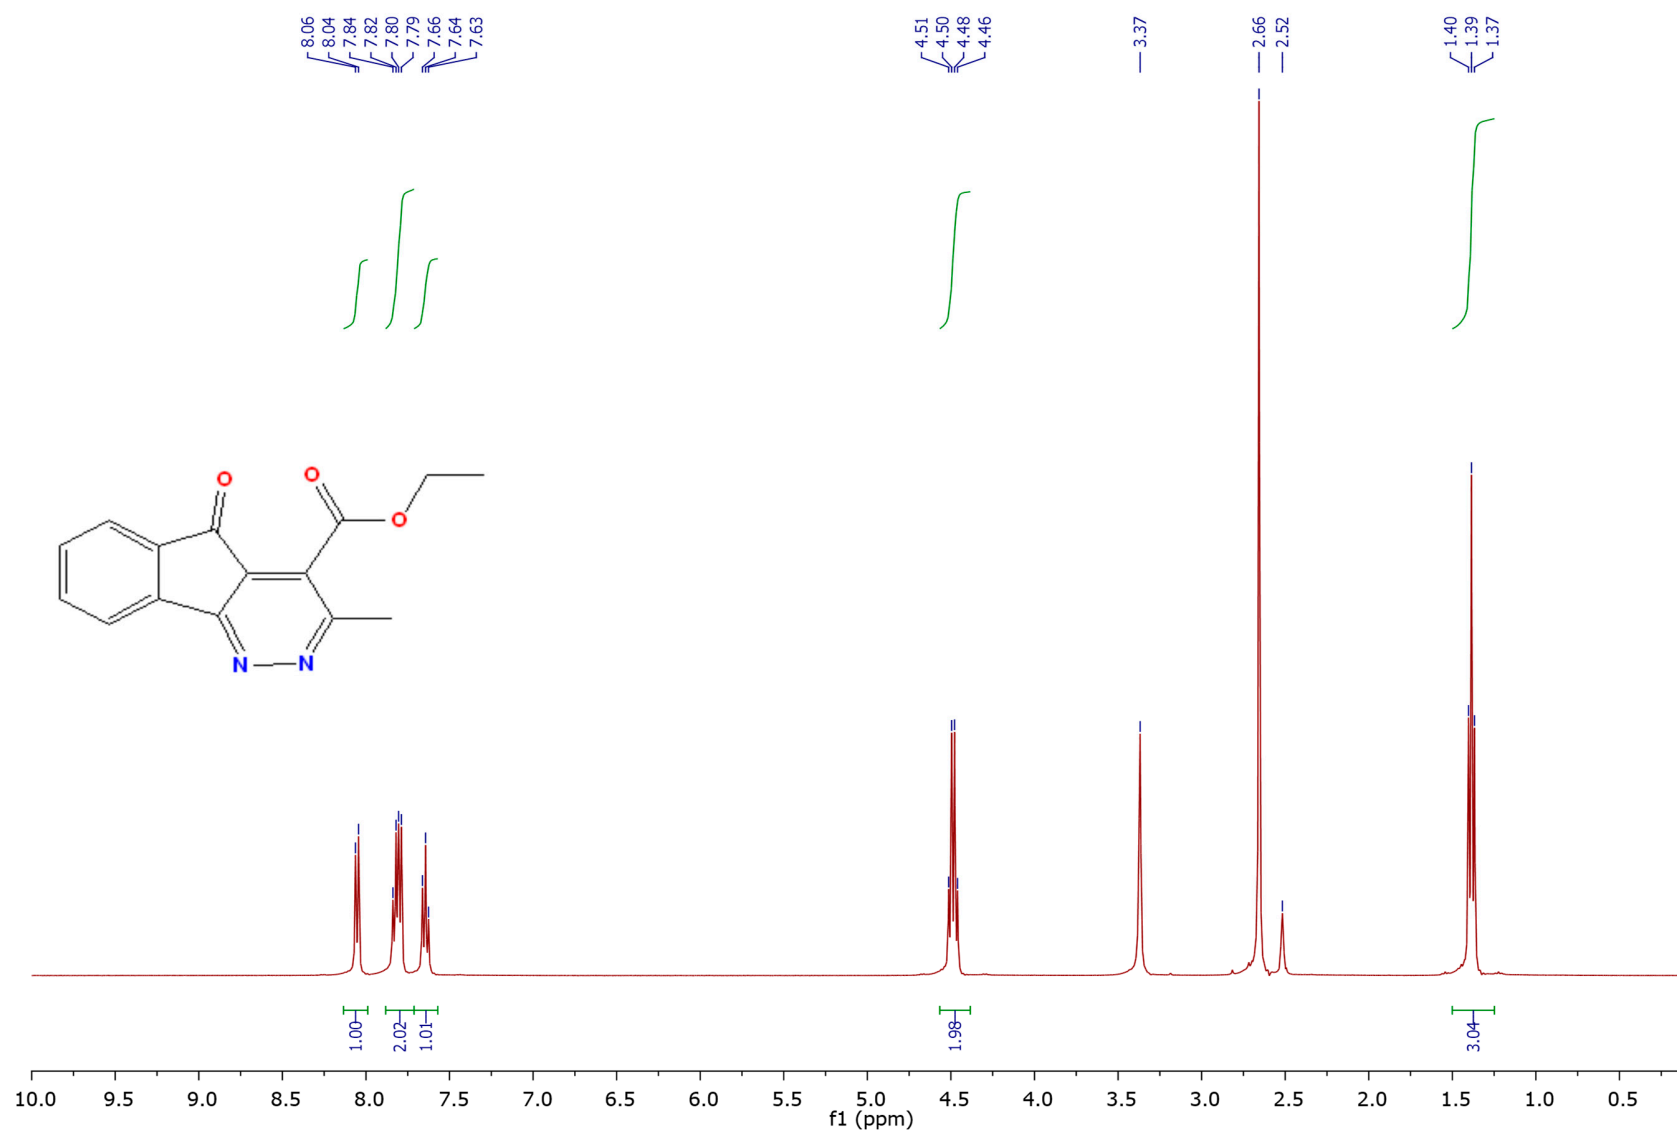

Figure S1. <sup>1</sup>H NMR of 8

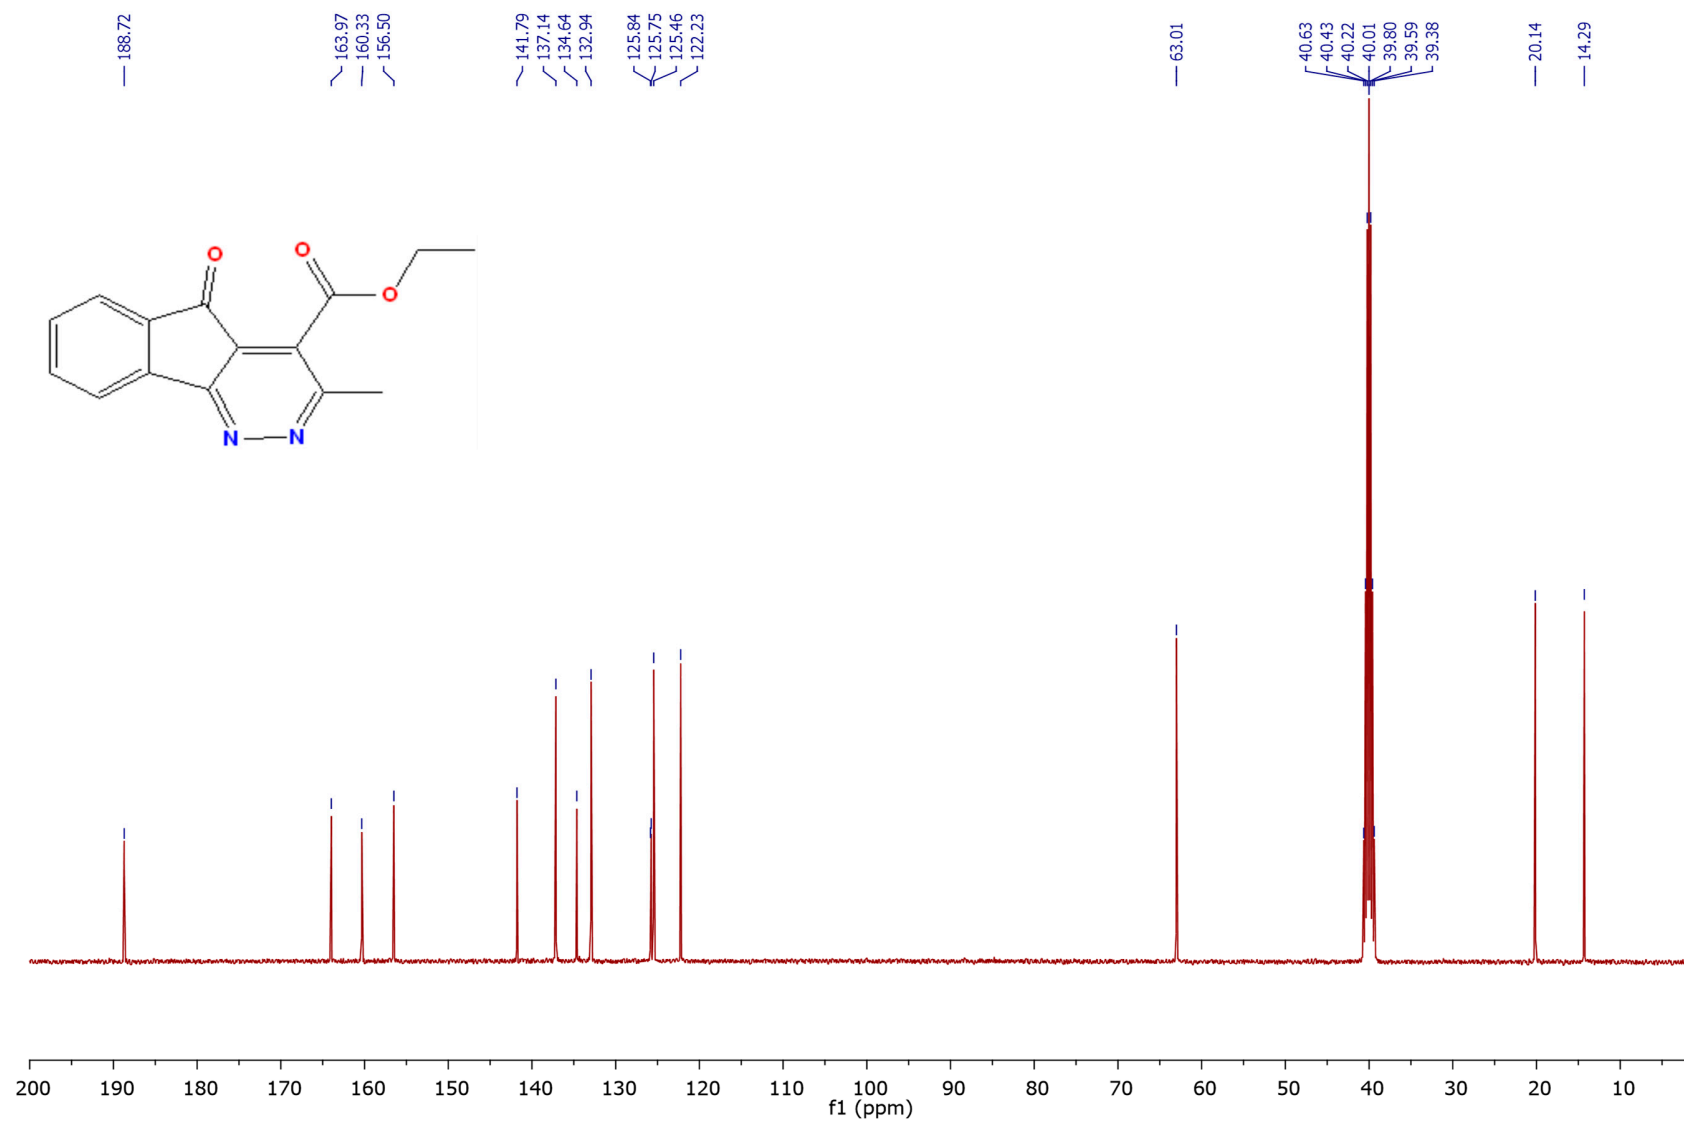

Figure S2.  $^{13}\text{C}$  NMR of 8

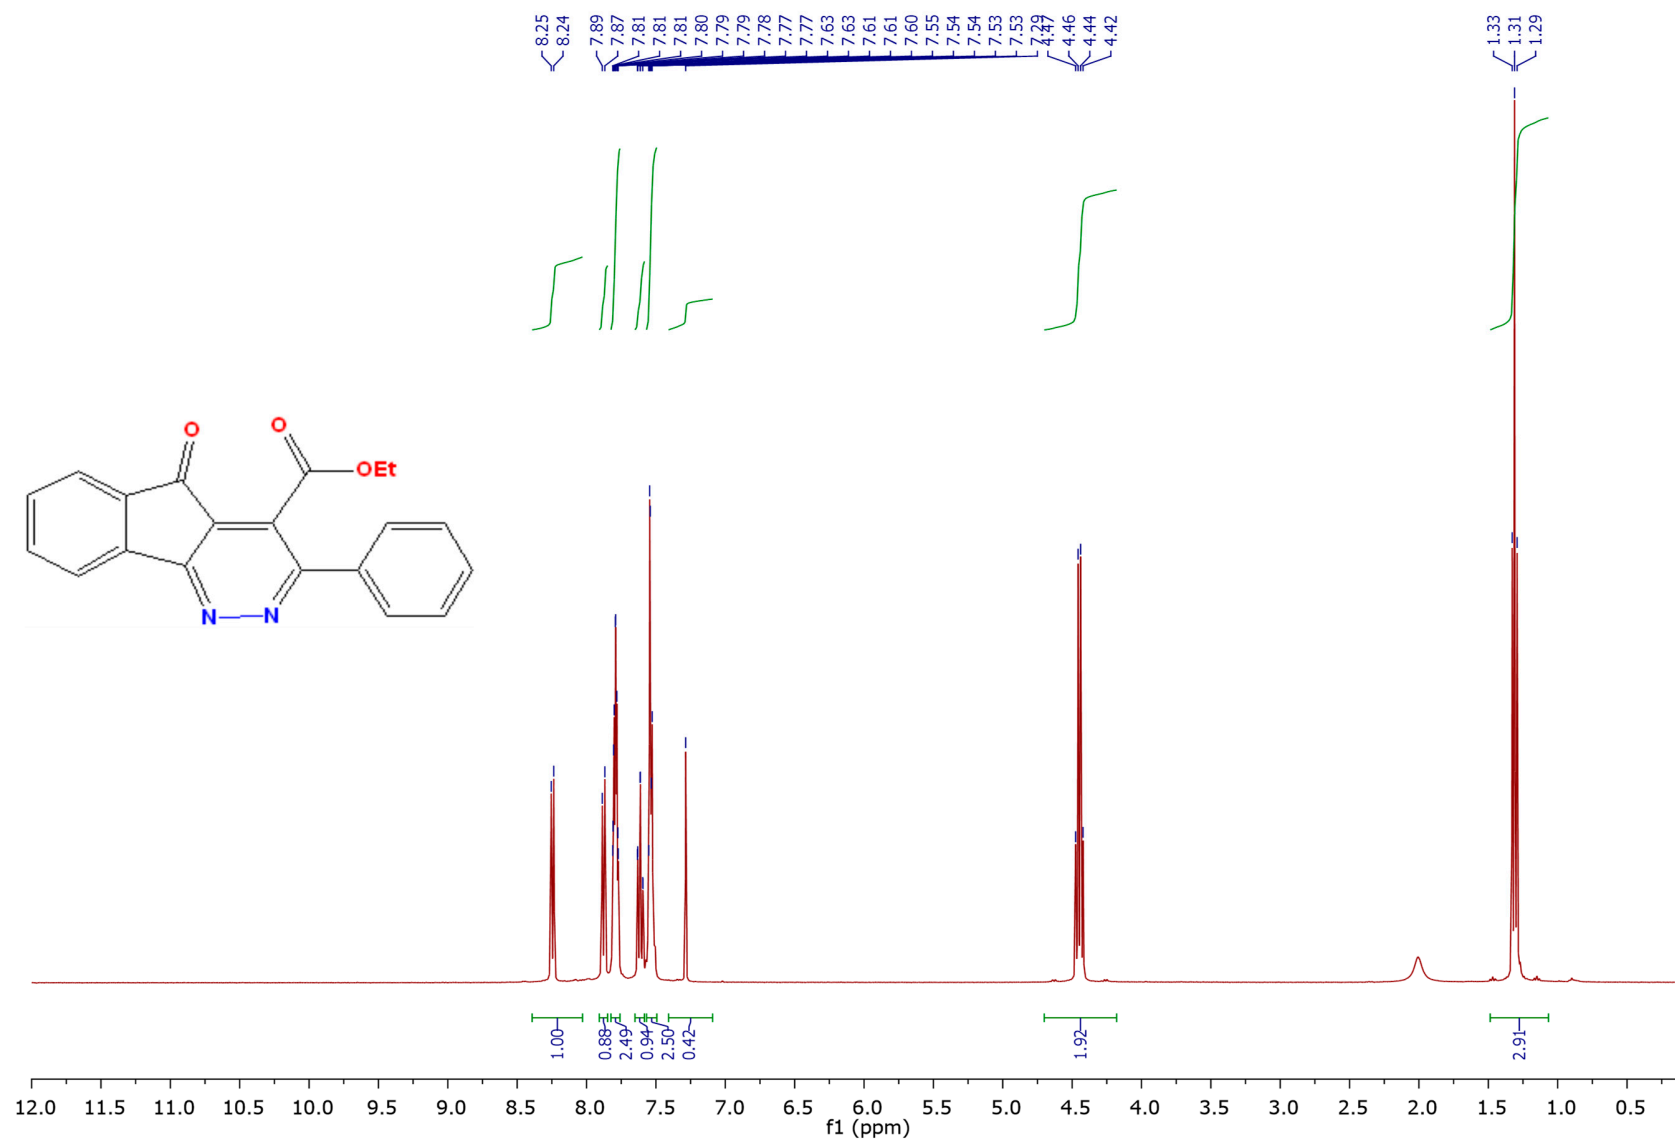

Figure S3. <sup>1</sup>H NMR of 10

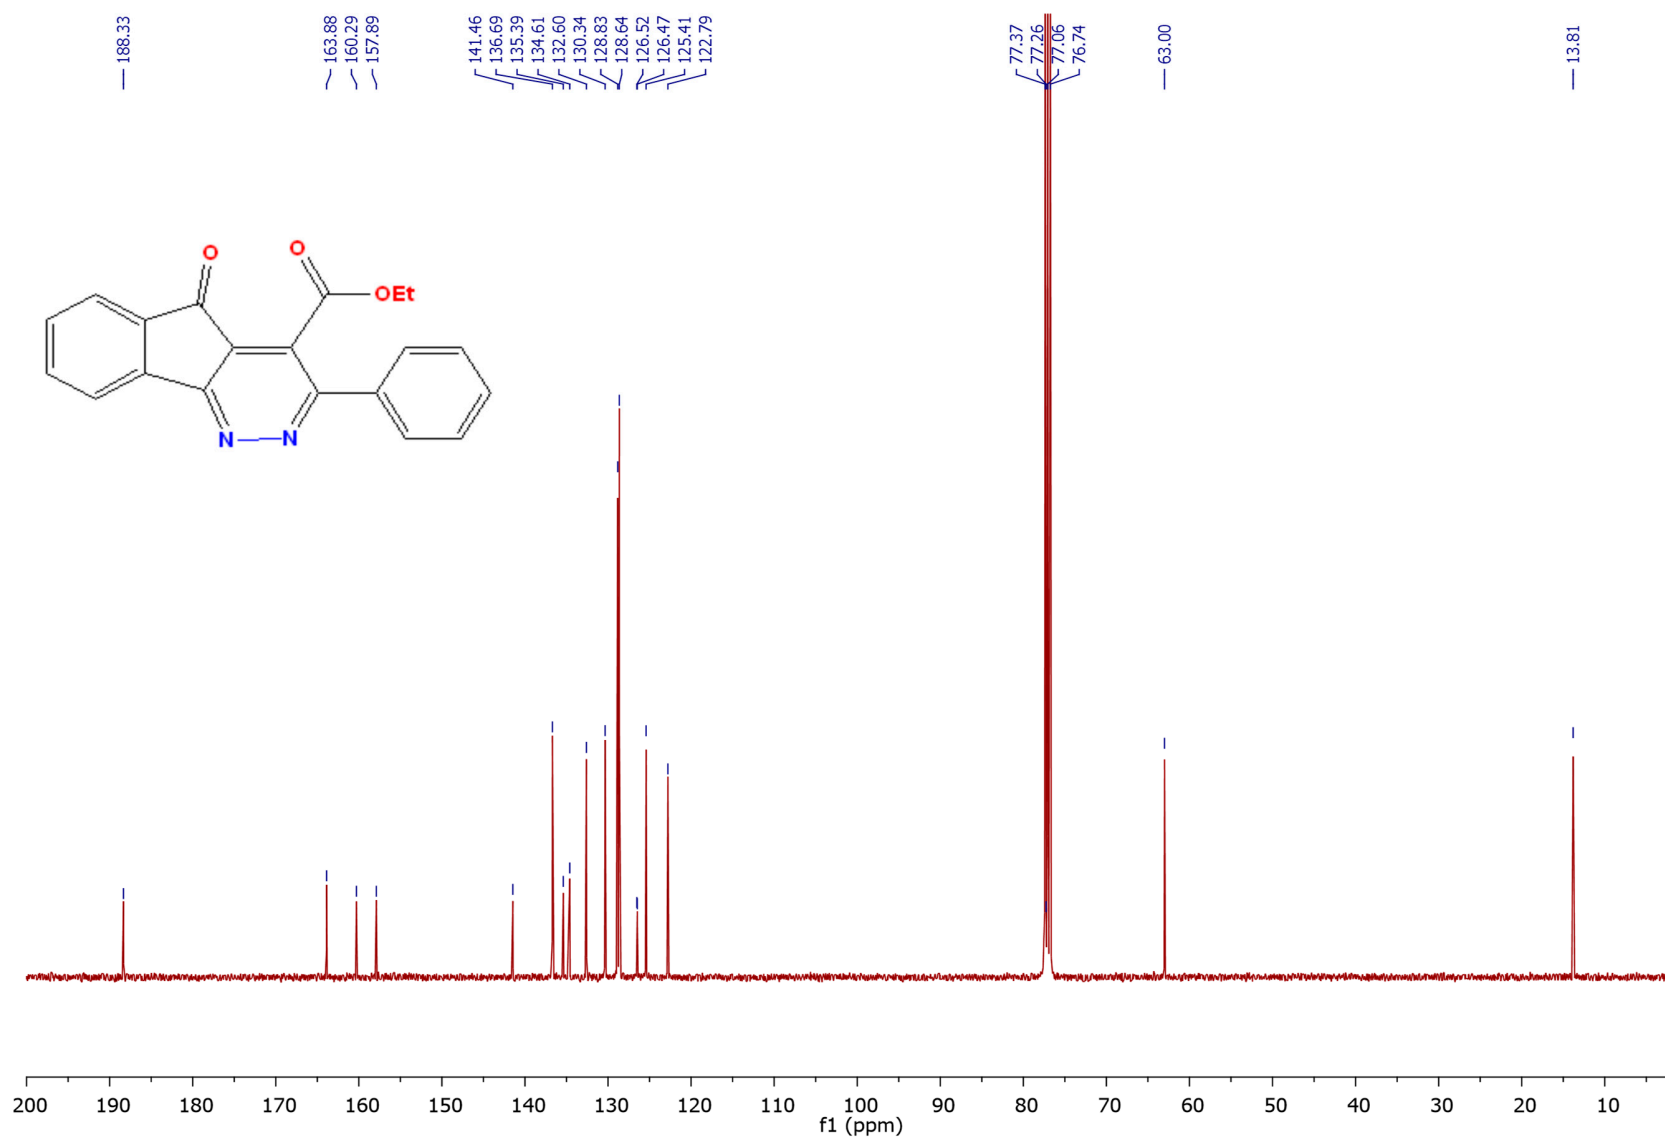

Figure S4.  $^{13}\text{C}$  NMR of 10

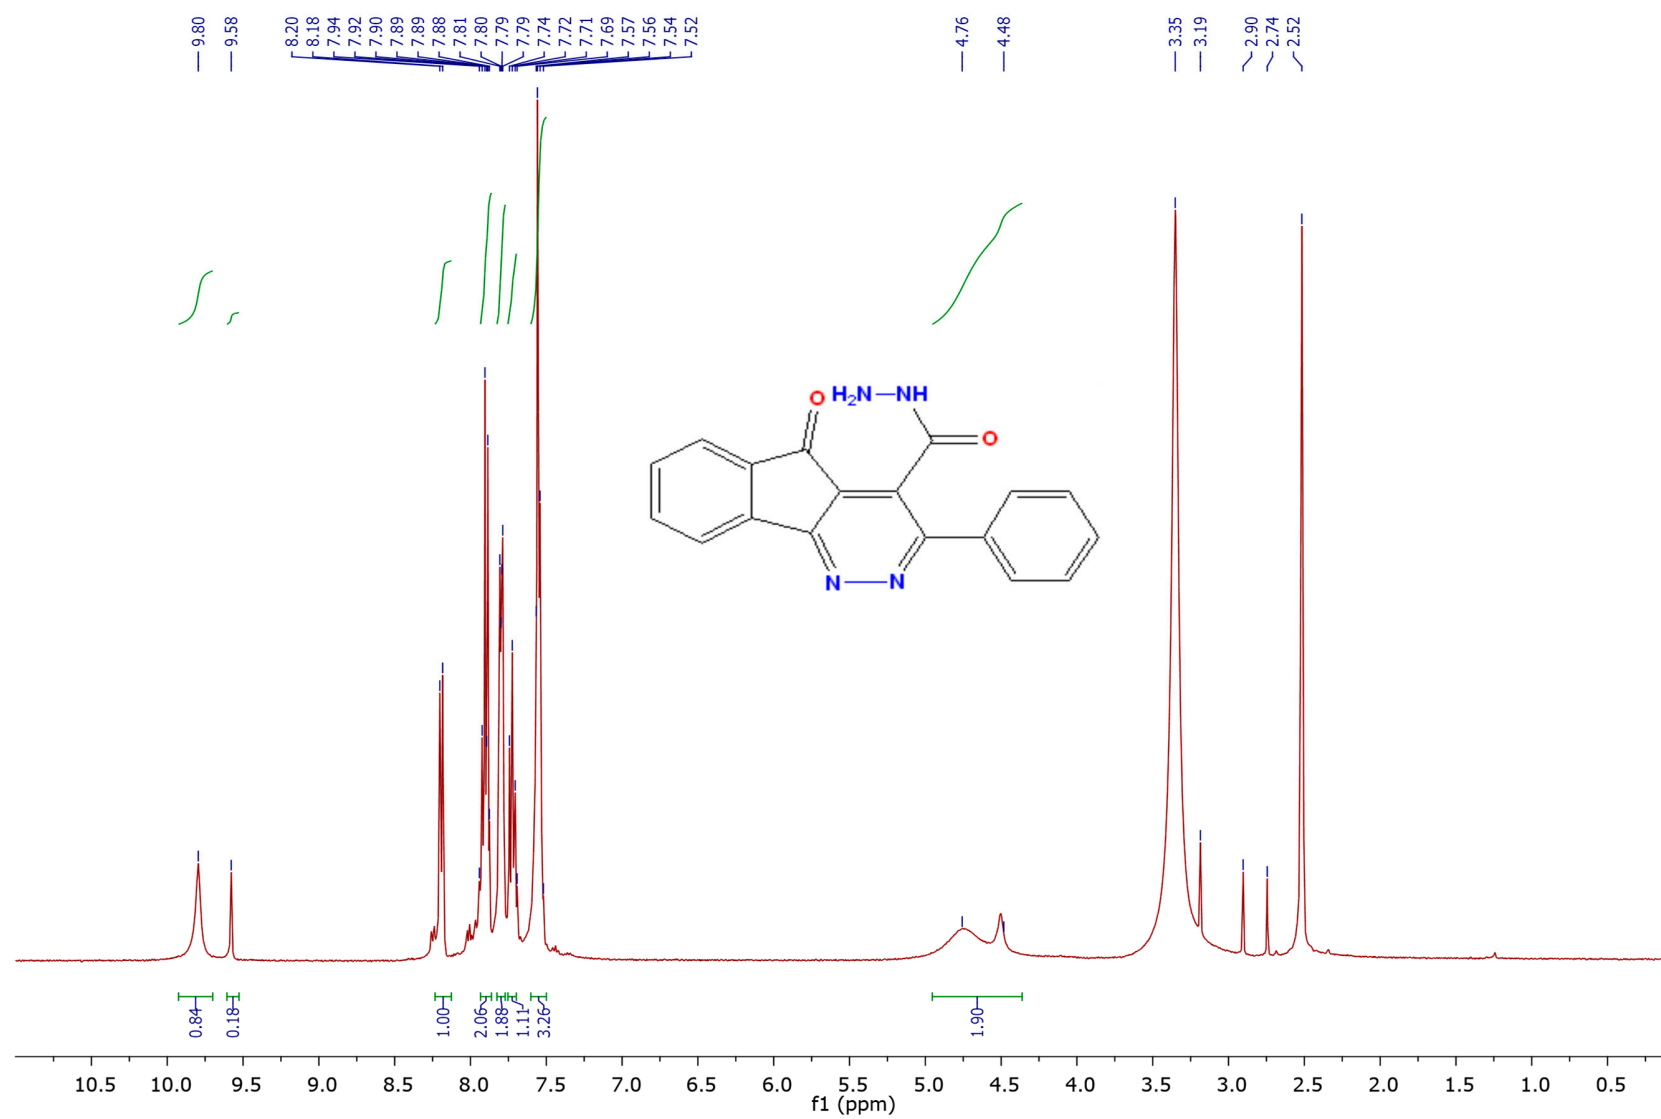

Figure S5.  $^1\text{H}$  NMR of 11

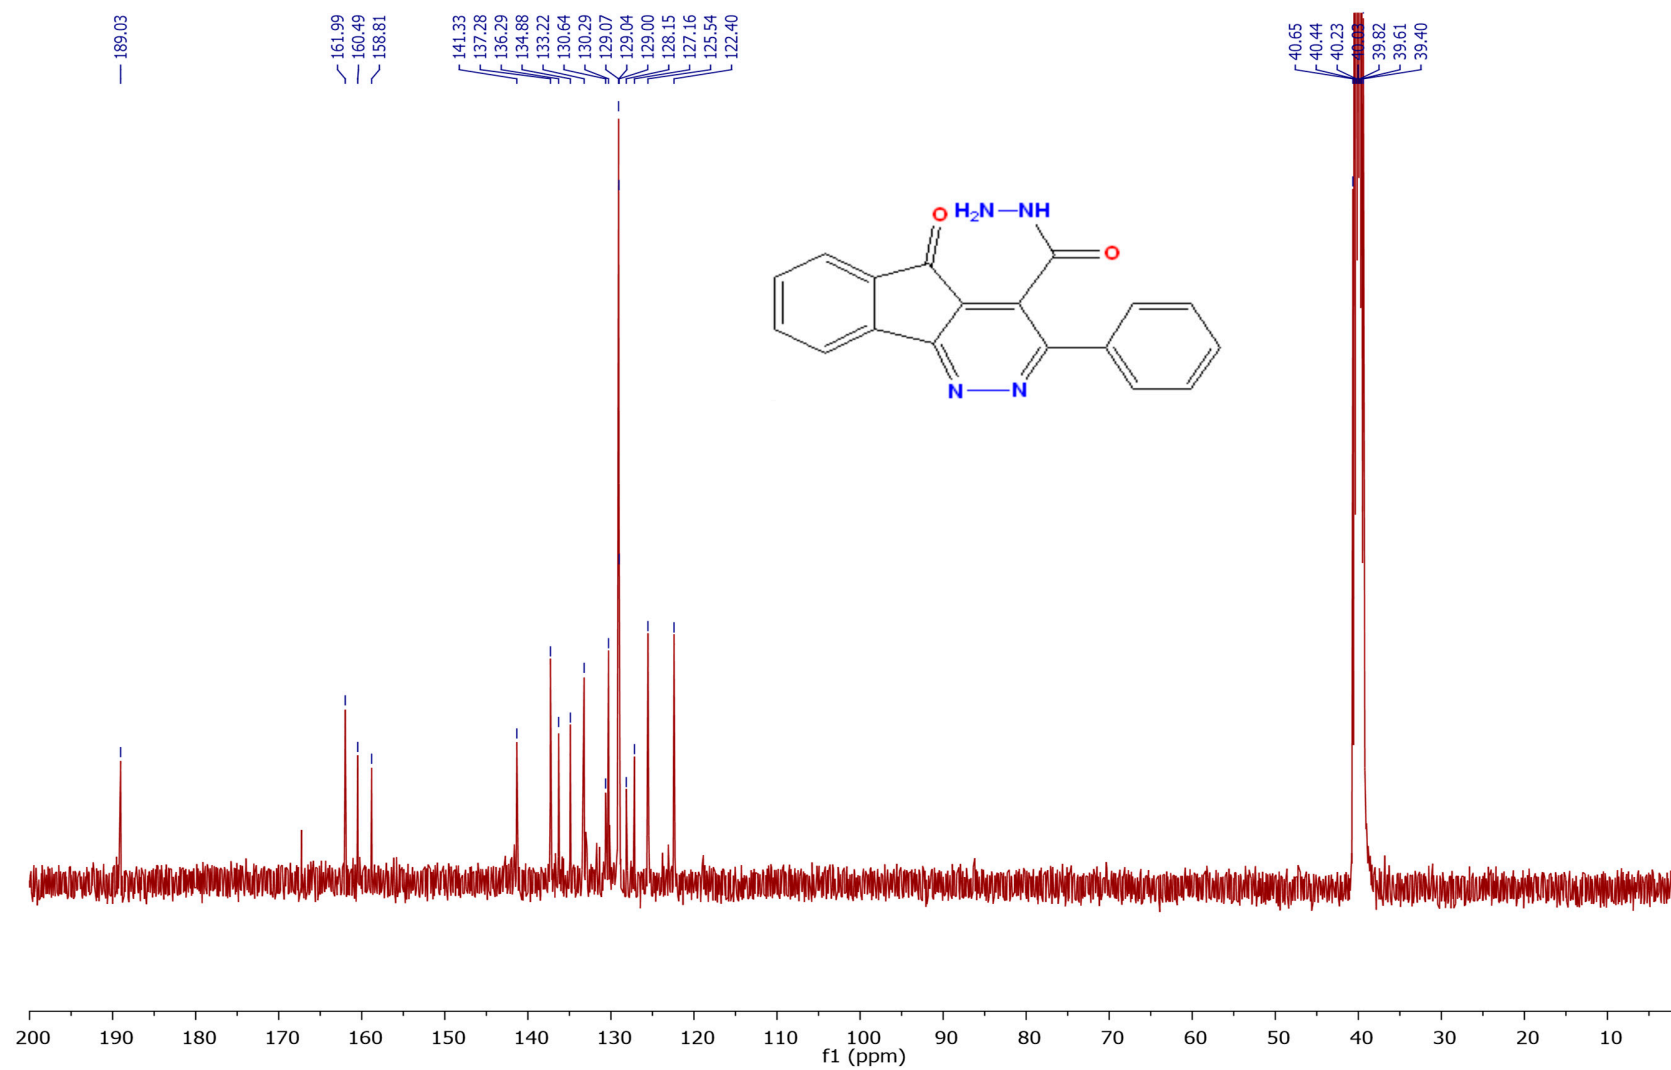

Figure S6.  $^{13}\text{C}$  NMR of **11**

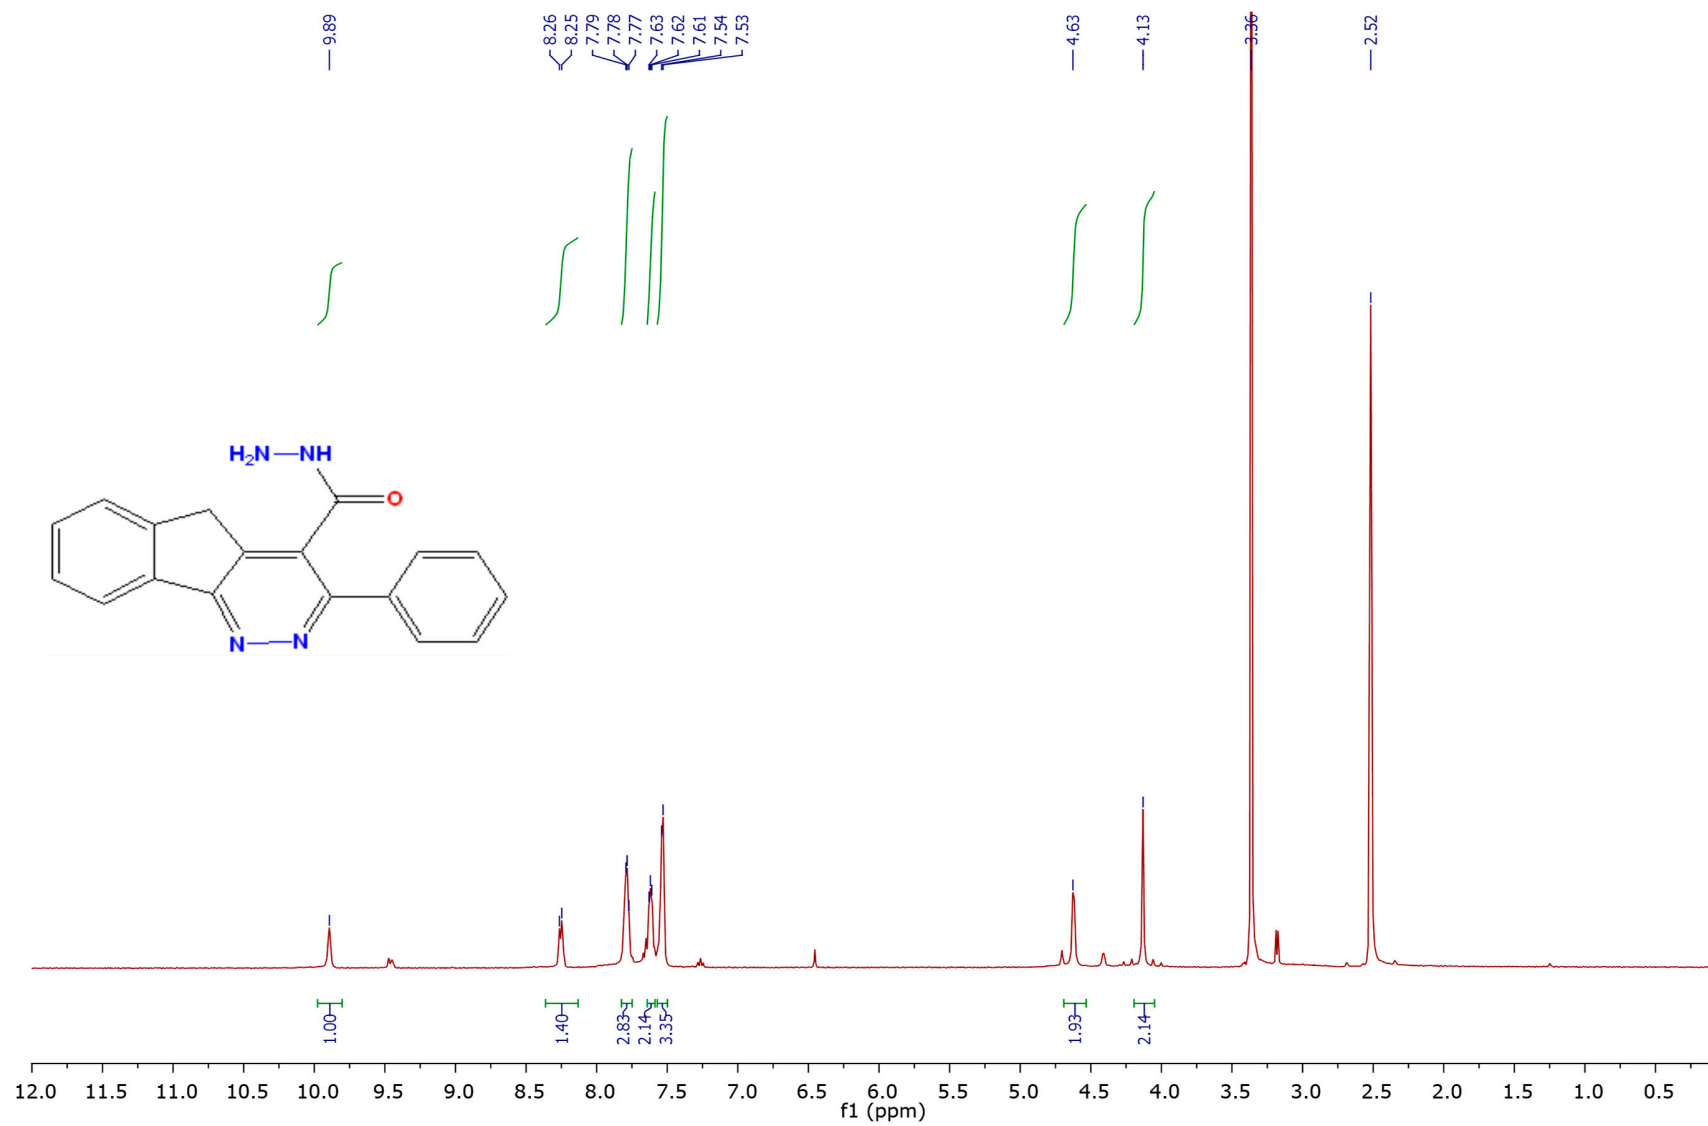

Figure S7. <sup>1</sup>H NMR of 12

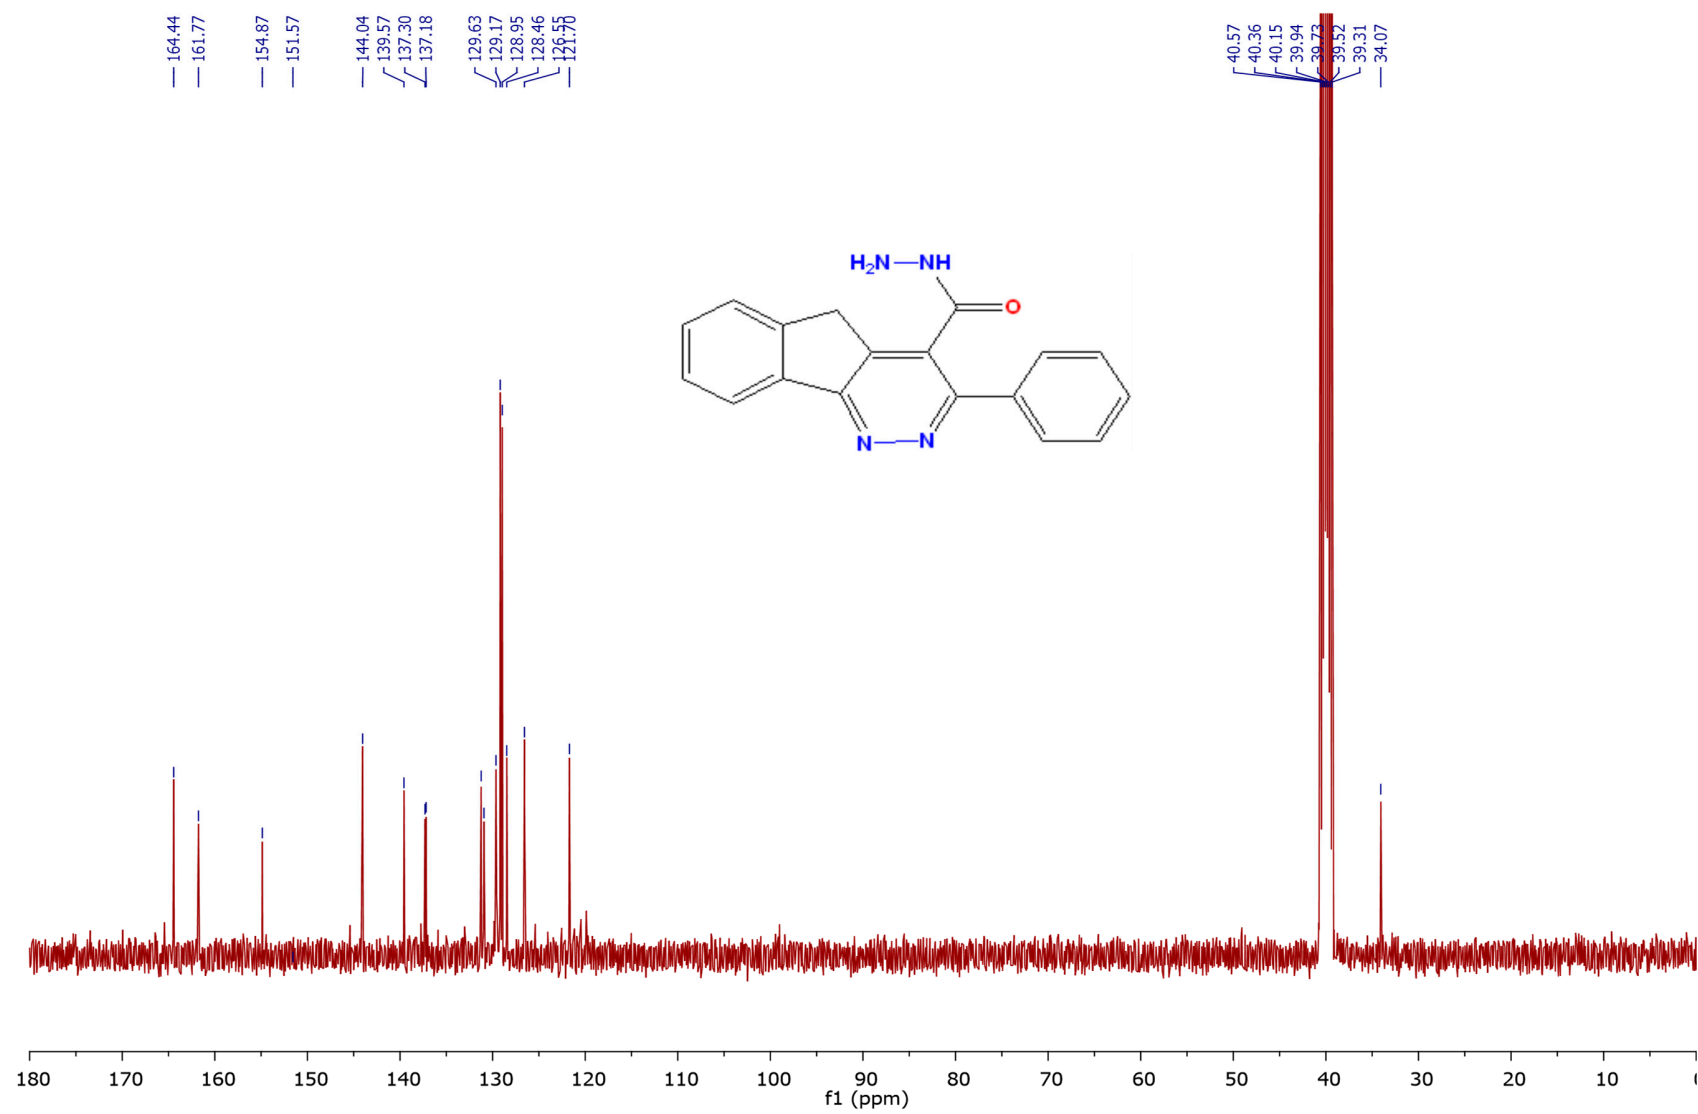

**Figure S8.** <sup>13</sup>C NMR of **12**

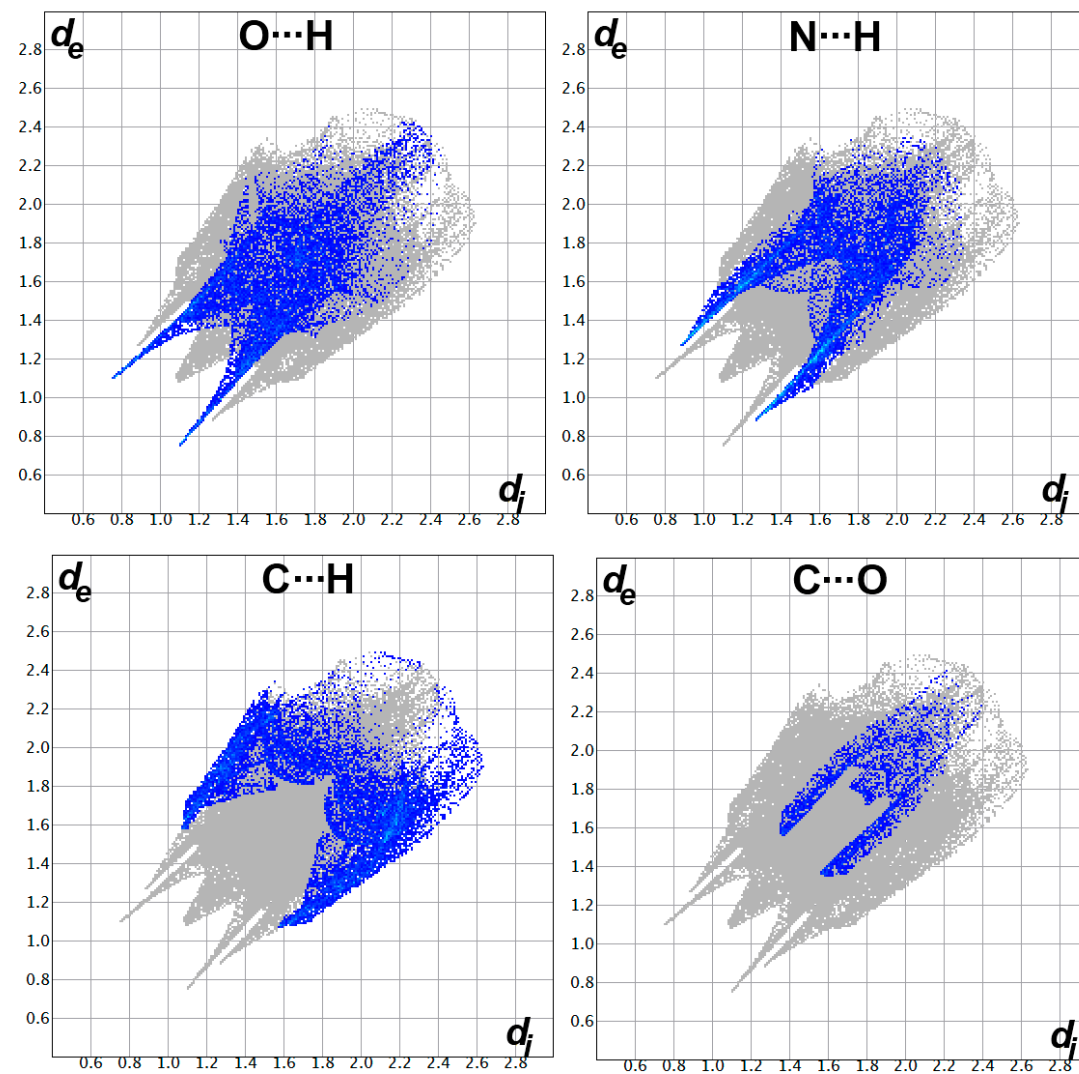

**Figure S9.** Fingerprint plots for the short interactions in **11**.

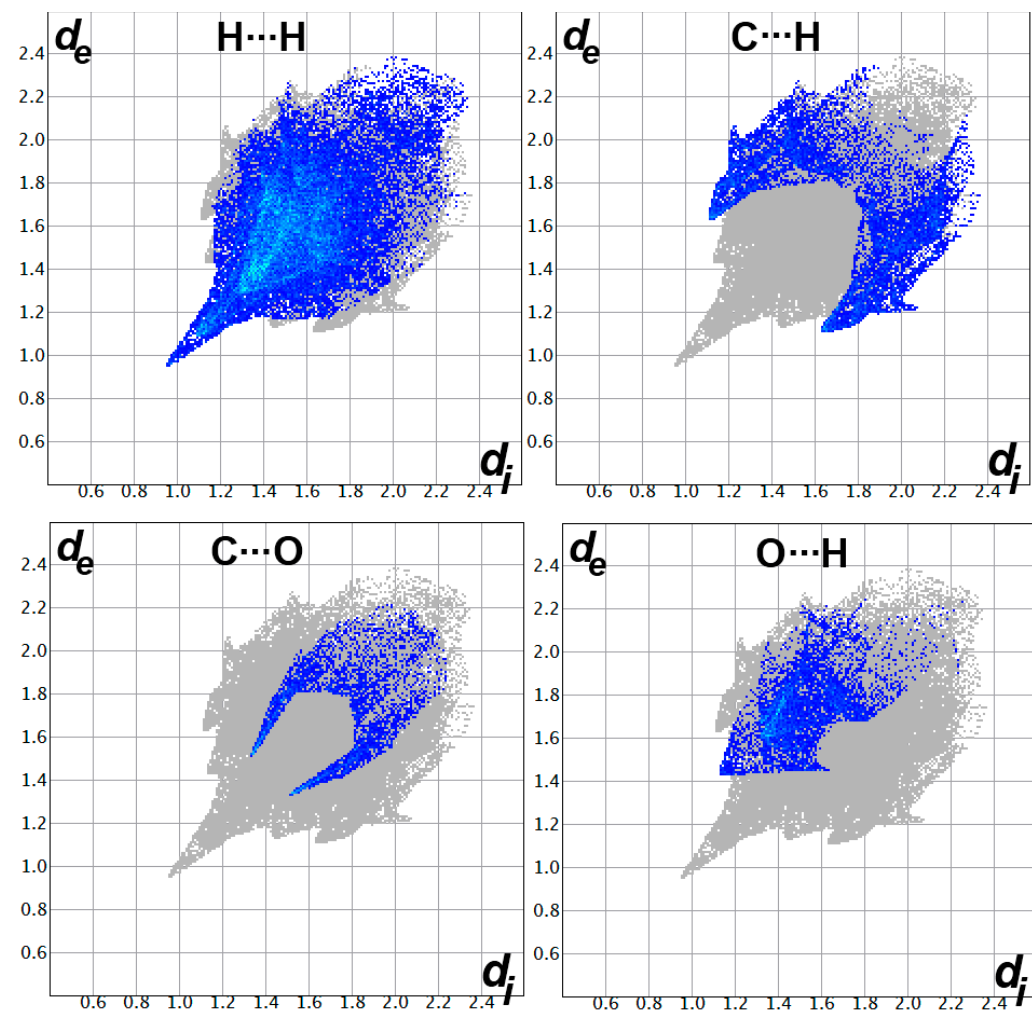

**Figure S10.** Fingerprint plots for the short interactions in **8**.

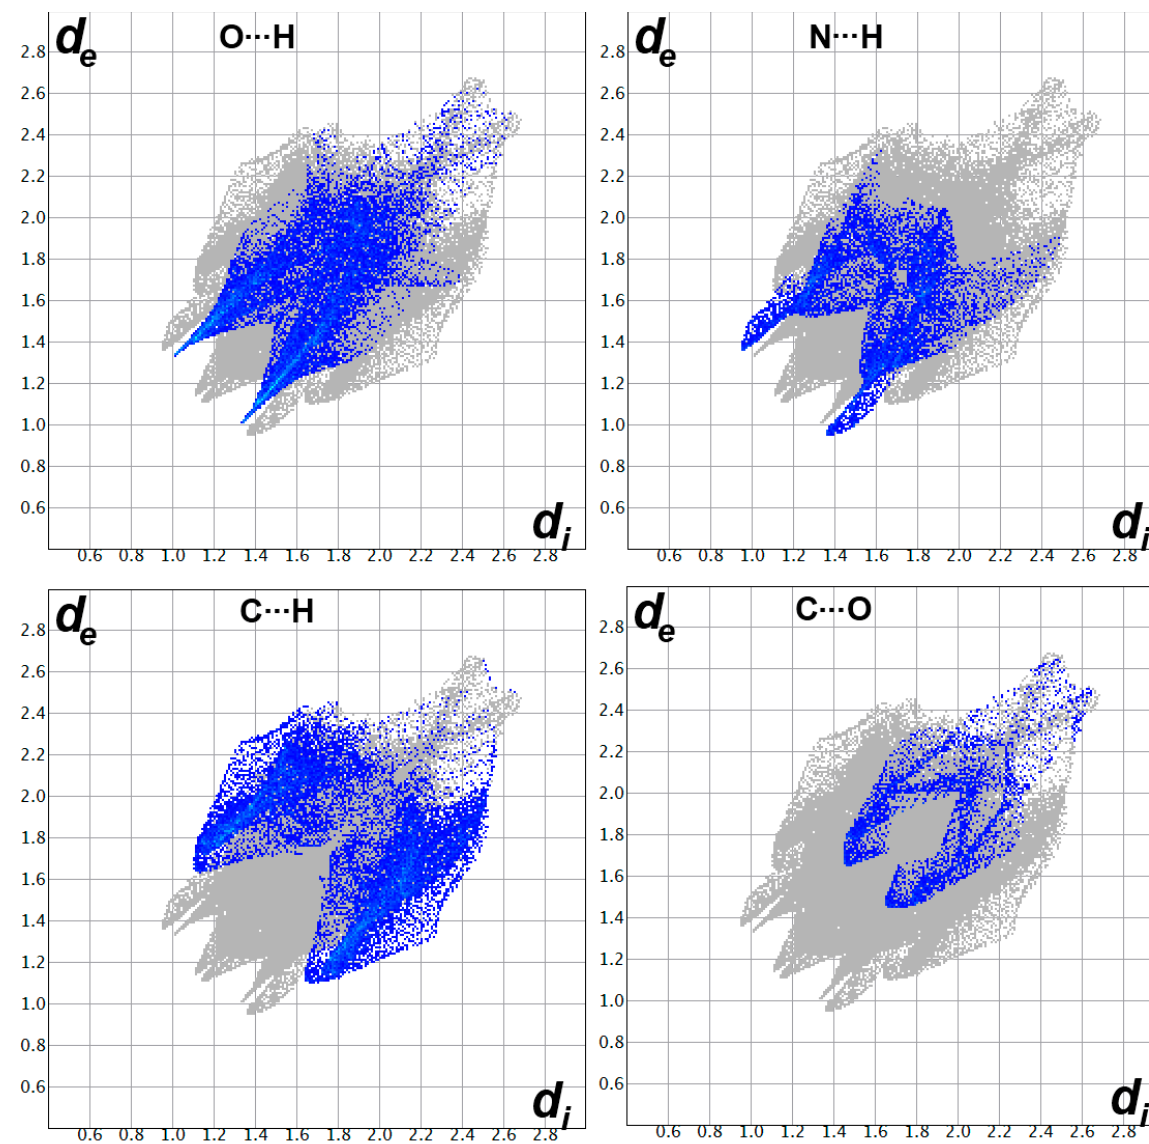

**Figure S11.** Fingerprint plots for the short contacts in **9**.

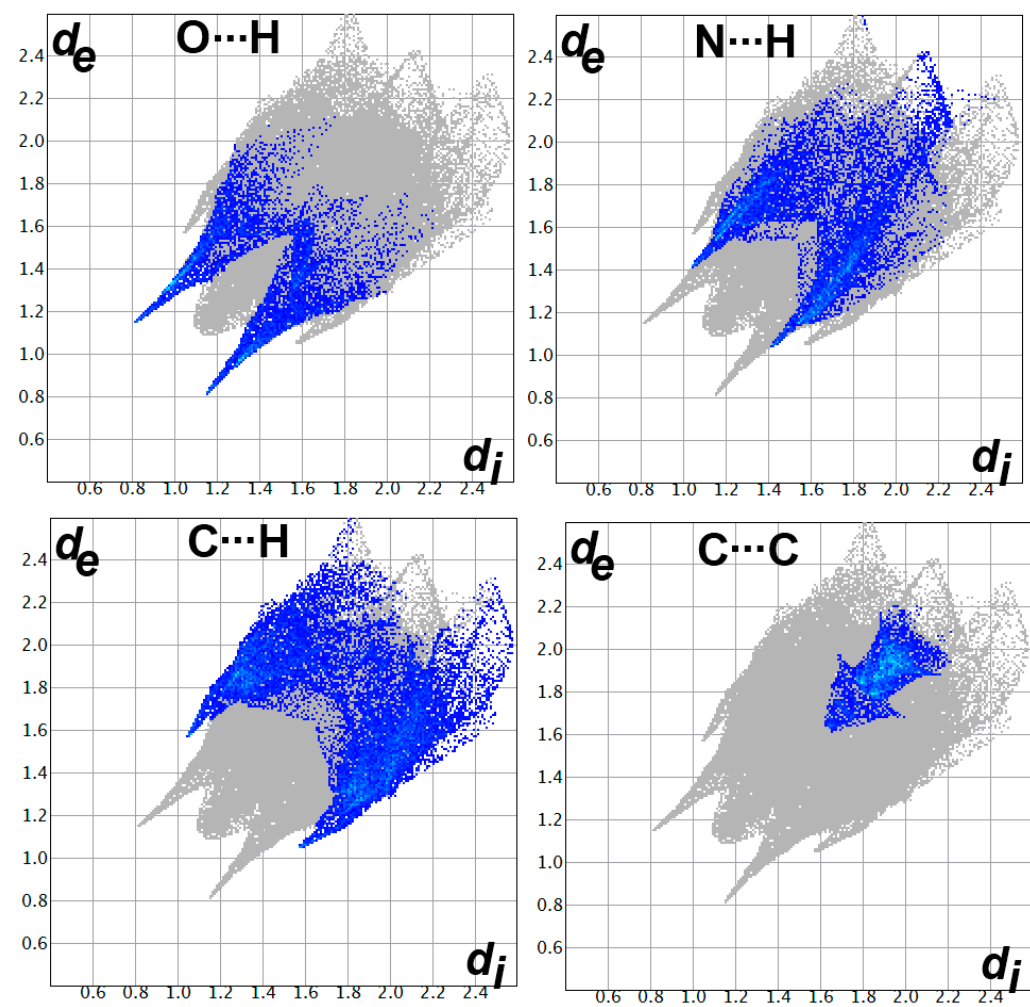

Figure S12. Fingerprint plots for the short contacts in 12.

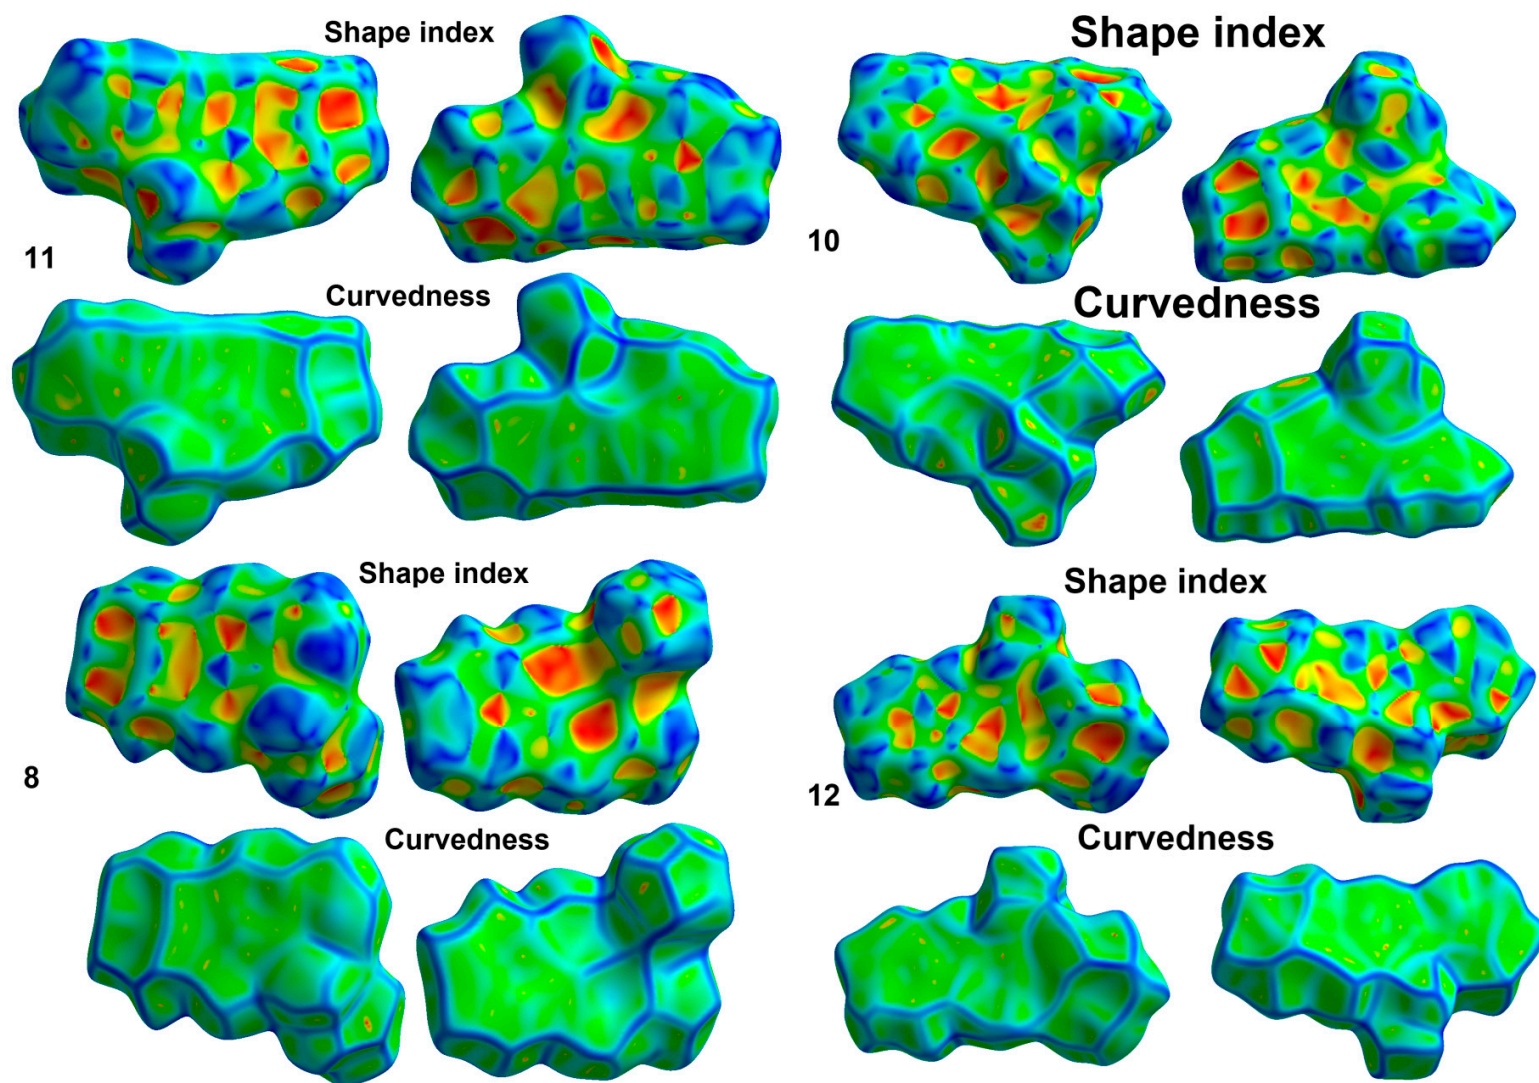

Figure S13. Shape index and curvedness maps for the studied systems.

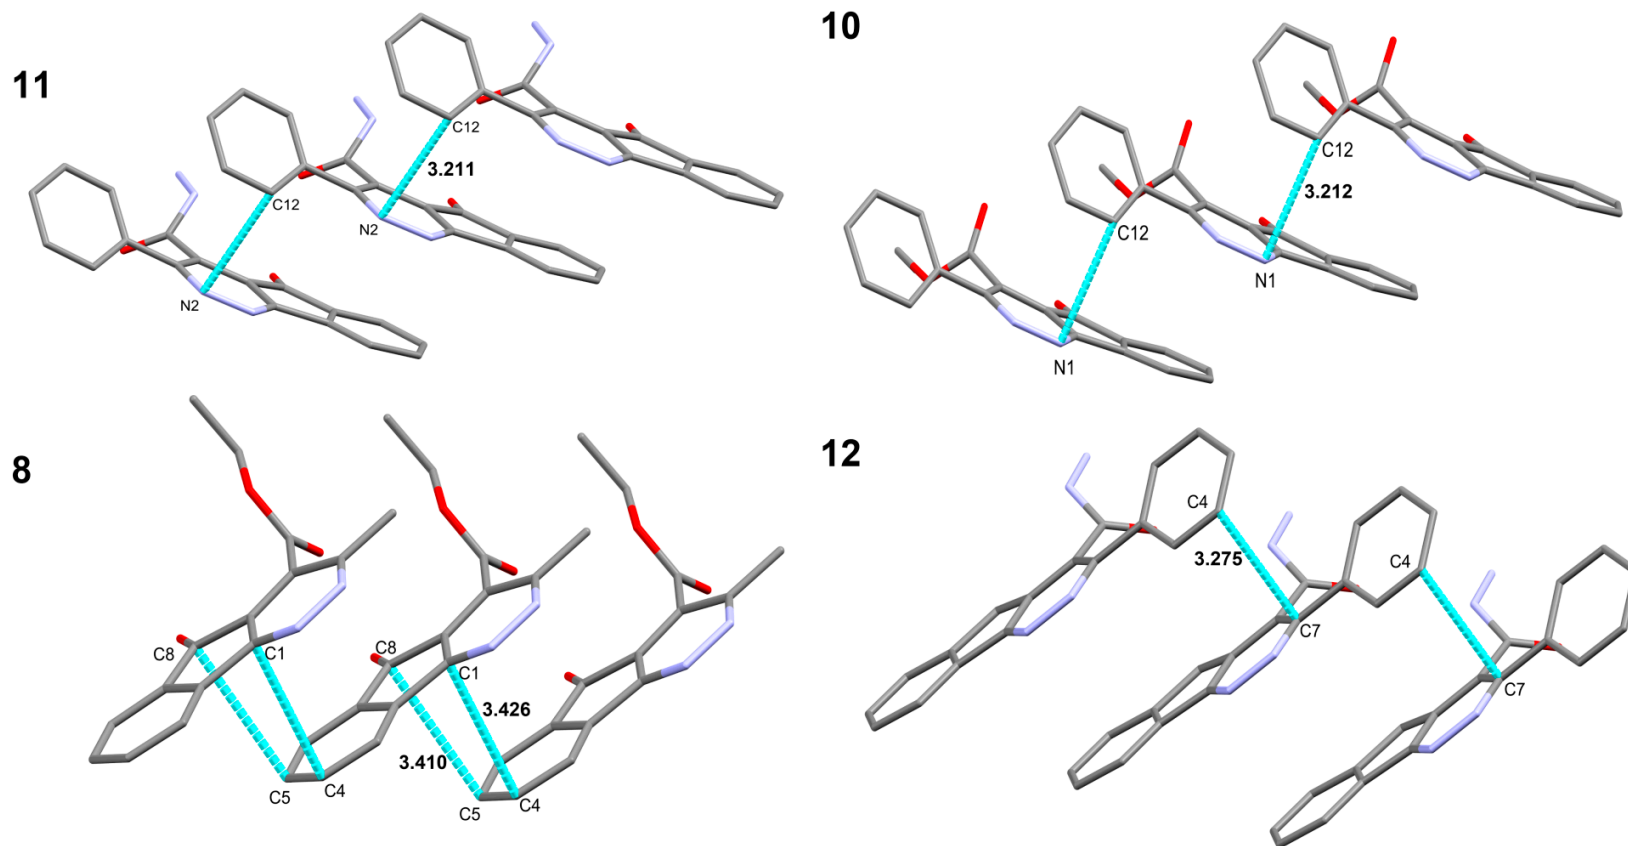

**Figure S14.** The most important  $\pi$ - $\pi$  stacking C...C/C...N contacts and their interaction distances in Å for the studied systems.

### X-Ray structure determination

Crystals **8**, **10**, **11** and **12** were immersed in cryo-oil, mounted in a loop, and measured at a temperature of 120 K. The X-ray diffraction data were collected on a Rigaku Oxford Diffraction Supernova diffractometer using Cu K $\alpha$  radiation. The *CrysAlisPro* [34] software package was used for cell refinement and data reduction. A multi-scan **9** and **11** or a Gaussian **8** and **12** absorption correction (*CrysAlisPro*) [35] was applied to the intensities before the structure solution. The structures were solved by the intrinsic phasing (*SHELXT*) [36] method. Structural refinements were carried out using *SHELXL* [36] software with *SHELXLE* [37] graphical user interface. The structure of **8** was found to be a two-component twin (twin matrix [1.000 0.000 0.333 0.000 -1.000 0.000 0.000 0.000 -1.000]). The BASF value was refined to 0.45. The NH and NH<sub>2</sub> hydrogen atoms in **11**, and **12** were located from the difference Fourier map and refined isotropically. All other hydrogen atoms were positioned geometrically and constrained to ride on their parent atoms, with C-H = 0.95-0.99 Å and  $U_{\text{iso}} = 1.2-1.5 \cdot U_{\text{eq}}(\text{parent atom})$ . The crystallographic details are summarized in Table 1. The topology analyses were performed using Crystal Explorer 17.5 program [38].

**Table S1.** Bond lengths (Å) and angles (°) for **11**, **8**, **10** and **12**.

| 11                            |            | 8                |            | 10               |            | 12               |            |
|-------------------------------|------------|------------------|------------|------------------|------------|------------------|------------|
| <b><u>Bond length (Å)</u></b> |            |                  |            |                  |            |                  |            |
| O(1)-C(2)                     | 1.2059(17) | O(1)-C(8)        | 1.2132(15) | O(1)-C(7)        | 1.2126(13) | O(11)-C(9)       | 1.240(2)   |
| O(2)-C(18)                    | 1.2234(18) | O(2)-C(11)       | 1.1974(16) | O(2)-C(18)       | 1.2050(13) | N(11)-C(9)       | 1.335(3)   |
| N(1)-C(9)                     | 1.3194(18) | O(3)-C(11)       | 1.3260(15) | O(3)-C(18)       | 1.3275(13) | N(11)-N(12)      | 1.420(2)   |
| N(1)-N(2)                     | 1.3542(17) | O(3)-C(12)       | 1.4595(15) | O(3)-C(19)       | 1.4684(13) | N(13)-C(18)      | 1.325(3)   |
| N(2)-C(10)                    | 1.3391(18) | N(1)-C(1)        | 1.3206(16) | N(1)-C(9)        | 1.3207(14) | N(13)-N(14)      | 1.345(3)   |
| N(3)-C(18)                    | 1.3401(18) | N(1)-N(2)        | 1.3603(17) | N(1)-N(2)        | 1.3525(13) | N(14)-C(7)       | 1.343(3)   |
| N(3)-N(4)                     | 1.4142(16) | N(2)-C(14)       | 1.3350(19) | N(2)-C(10)       | 1.3396(14) | O(11)-C(9)       | 1.240(2)   |
| <b><u>Bond angle (°)</u></b>  |            |                  |            |                  |            |                  |            |
| C(9)-N(1)-N(2)                | 117.43(11) | N(2)-C(14)-C(15) | 116.20(12) | C(18)-O(3)-C(19) | 115.06(8)  | C(9)-N(11)-N(12) | 121.75(18) |
| C(10)-N(2)-N(1)               | 121.35(11) | O(2)-C(11)-O(3)  | 125.89(12) | C(9)-N(1)-N(2)   | 117.31(9)  | C(7)-N(14)-N(13) | 121.36(19) |
| C(18)-N(3)-N(4)               | 121.23(12) | O(2)-C(11)-C(10) | 124.69(11) | C(10)-N(2)-N(1)  | 121.36(9)  | C(2)-C(1)-C(6)   | 120.2(2)   |
| O(1)-C(2)-C(3)                | 127.32(13) | O(3)-C(11)-C(10) | 109.41(10) | C(6)-C(1)-C(2)   | 117.88(11) | C(3)-C(2)-C(1)   | 120.6(2)   |
| O(1)-C(2)-C(1)                | 128.13(13) | O(3)-C(12)-C(13) | 106.53(11) | N(1)-C(9)-C(8)   | 124.34(10) | C(4)-C(3)-C(2)   | 119.5(2)   |
| O(2)-C(18)-N(3)               | 124.94(13) | C(11)-O(3)-C(12) | 116.58(10) | N(1)-C(9)-C(5)   | 126.62(9)  | C(5)-C(4)-C(3)   | 120.2(2)   |
| O(2)-C(18)-C(17)              | 121.51(12) | C(1)-N(1)-N(2)   | 116.95(11) | C(8)-C(9)-C(5)   | 109.04(9)  | O(11)-C(9)-N(11) | 122.25(18) |
| N(1)-C(9)-C(1)                | 124.29(13) | C(14)-N(2)-N(1)  | 121.51(11) | N(2)-C(10)-C(17) | 122.54(10) | O(11)-C(9)-C(8)  | 122.98(19) |
| N(1)-C(9)-C(8)                | 126.29(12) | N(1)-C(1)-C(9)   | 124.44(12) | N(2)-C(10)-C(11) | 115.00(9)  | N(11)-C(9)-C(8)  | 114.74(18) |
| C(1)-C(9)-C(8)                | 109.42(11) | N(1)-C(1)-C(2)   | 126.82(12) | O(2)-C(18)-O(3)  | 125.90(10) | C(1)-C(6)-C(7)   | 122.71(19) |
| N(2)-C(10)-C(17)              | 122.46(12) | N(2)-C(14)-C(10) | 122.52(12) | O(2)-C(18)-C(17) | 121.58(10) | N(14)-C(7)-C(8)  | 122.56(19) |
| N(2)-C(10)-C(11)              | 114.04(11) | N(2)-C(14)-C(15) | 116.20(12) | O(3)-C(18)-C(17) | 112.52(9)  | N(14)-C(7)-C(6)  | 113.24(18) |
| N(3)-C(18)-C(17)              | 113.54(12) | O(2)-C(11)-O(3)  | 125.89(12) | O(3)-C(19)-C(20) | 109.56(10) | C(8)-C(7)-C(6)   | 124.19(19) |
